# Supplementary material for: An In Silico Framework to Mine Bioactive Peptides from Annotated Proteomes: A Case Study on Pancreatic Alpha Amylase Inhibitory Peptides from Algae and Cyanobacteria
Source: MDPI journal article supplement (doi:10.3390/nu14214680), 2022-11-04
Supplement: s1 [file s1]

## Supplementary material

### An In Silico Framework to Mine Bioactive Peptides from Annotated Proteomes: A Case Study on Pancreatic Alpha Amylase Inhibitory Peptides from Algae and Cyanobacteria

**Table S1.** List of papers containing alpha amylase inhibitory peptides retrieved from the literature

| First author                | Year of publication | DOI                                                                                                           |
|-----------------------------|---------------------|---------------------------------------------------------------------------------------------------------------|
| Ochiai <i>et al.</i> [50]   | 2012                | <a href="https://doi.org/10.1271/bbb.110963">https://doi.org/10.1271/bbb.110963</a>                           |
| Yu <i>et al.</i> [51]       | 2012                | <a href="https://doi.org/10.1016/j.foodchem.2012.06.088">https://doi.org/10.1016/j.foodchem.2012.06.088</a>   |
| Ngoh <i>et al.</i> [52]     | 2016                | <a href="https://doi.org/10.1016/j.enzmictec.2016.04.001">https://doi.org/10.1016/j.enzmictec.2016.04.001</a> |
| Ngoh <i>et al.</i> [53]     | 2017                | <a href="https://doi.org/10.1016/j.jff.2017.06.037">https://doi.org/10.1016/j.jff.2017.06.037</a>             |
| Ramadhan <i>et al.</i> [41] | 2017                | <a href="https://doi.org/10.1080/10942912.2017.1354885">https://doi.org/10.1080/10942912.2017.1354885</a>     |
| Admassu <i>et al.</i> [42]  | 2018                | <a href="https://doi.org/10.1021/acs.jafc.8b00960">https://doi.org/10.1021/acs.jafc.8b00960</a>               |
| Mudgil <i>et al.</i> [54]   | 2018                | <a href="https://doi.org/10.1016/j.foodchem.2018.03.082">https://doi.org/10.1016/j.foodchem.2018.03.082</a>   |
| Awosika <i>et al.</i> [39]  | 2019                | <a href="https://doi.org/10.1111/ijfs.14087">https://doi.org/10.1111/ijfs.14087</a>                           |
| Mudgil <i>et al.</i> [40]   | 2021                | <a href="https://doi.org/10.1016/j.foodchem.2021.129374">https://doi.org/10.1016/j.foodchem.2021.129374</a>   |

**Table S2.** Model table obtained via an in-house python script after parsing the computed alignments. The randomly selected results (n=14) are here reported to give a glance of the whole table

| Peptide Source <sup>1</sup>    | Peptide Length | Protein AC <sup>2</sup> | Identity % <sup>3</sup> | Coverage % <sup>4</sup> | Similarity % <sup>5</sup> |
|--------------------------------|----------------|-------------------------|-------------------------|-------------------------|---------------------------|
| SAAP-CHINESE GIANT SALAMANDER  | 4              | A0A087SCK4              | 100                     | 100                     | 100                       |
| MPSKPPLL-CAMEL MILK PROTEIN    | 8              | A0A087SNZ9              | 100                     | 63                      | 100                       |
| KLPGF-OVALBUMIN                | 5              | A0A3M7L4J3              | 50                      | 80                      | 100                       |
| YSFR-CHINESE GIANT SALAMANDER  | 4              | A0A087S9R0              | 67                      | 75                      | 100                       |
| KDLWDDFKGL-CAMEL MILK PROTEIN  | 10             | A0A1D2A5H4              | 100                     | 50                      | 100                       |
| CSSV-CHINESE GIANT SALAMANDER  | 4              | A0A3M7KXG9              | 100                     | 100                     | 100                       |
| PPHMGGP-PINTO BEAN             | 7              | A0A1B7X551              | 40                      | 71                      | 80                        |
| PGGP-CHINESE GIANT SALAMANDER  | 4              | A0A1D1ZMS4              | 100                     | 100                     | 100                       |
| SAAP-CHINESE GIANT SALAMANDER  | 4              | A0A0B0QPM2              | 100                     | 100                     | 100                       |
| EAGVD-OVALBUMIN                | 5              | A0A1B7X1X6              | 100                     | 100                     | 100                       |
| PLPLHMLP-PINTO BEAN            | 8              | A0A087SNH2              | 100                     | 100                     | 100                       |
| LGGGN-CHINESE GIANT SALAMANDER | 5              | A0A087S9I4              | 60                      | 100                     | 80                        |
| ELS-RED SEAWEED                | 3              | A0A1B7WWG9              | 100                     | 67                      | 100                       |
| PPHMLP-PINTO BEAN              | 6              | A0A3M7KYS1              | 100                     | 33                      | 100                       |

<sup>1</sup> Indicates the active sequence (e.g. SAAP) and the source organism where the peptide was described and studied for the first time (e.g. Chinese Giant Salamander)

<sup>2</sup> Indicates the UniProt accession code (AC) of the algae protein where the active peptide or a similar sequence (according to the Smith-Waterman algorithm; see Section 2) has been found

<sup>3</sup> Indicates the identity percentage between the active peptide described in previous studies and algae protein fragment it has been aligned to

<sup>4</sup> Indicates the sequence coverage percentage. It is given by the ratio of the number of residues of the active peptide aligned on the algae protein and the total number of residues composing the active peptide.

<sup>5</sup> Indicates the sequence similarity percentage according to the Smith-Waterman algorithm; see Section 2 for further details

**Table S3.** UniProt accession code of reviewed proteins analysed in this study

| <b>Algae</b>             | <b>UniProt codes</b>                                                                                                                                                                                                                                                                                                                                                                                                                                                                                                                                                                                                                                                                                                                           |
|--------------------------|------------------------------------------------------------------------------------------------------------------------------------------------------------------------------------------------------------------------------------------------------------------------------------------------------------------------------------------------------------------------------------------------------------------------------------------------------------------------------------------------------------------------------------------------------------------------------------------------------------------------------------------------------------------------------------------------------------------------------------------------|
| AFA                      | A0A0B0QJR1, A0A0B0QJN8, P85869, P00116, P00244, P56151, P85868                                                                                                                                                                                                                                                                                                                                                                                                                                                                                                                                                                                                                                                                                 |
| <i>A. protothecoides</i> | Q6VQA9, Q6VQA8, Q7YKW4, P13347, P13348, Q9XFY6                                                                                                                                                                                                                                                                                                                                                                                                                                                                                                                                                                                                                                                                                                 |
| <i>C. vulgaris</i>       | P56318, Q9ZRJ4, P12466, P56341, P56319, P56291, P56342, P56302, P56304, P56293, P56301, P56294, P56308, Q01170, P56303, P56344, P56297, P56316, P56300, P12465, P56323, P32978, P56317, P56321, P56309, P56310, P56362, P56354, O20163, P56306, P56361, P56359, P56352, P56296, P56292, P56295, P56315, P56305, P56350, P56346, P56339, P56325, P56348, P56340, P56322, P56368, P56298, P58214, P56338, P32975, P56299, P56365, P56355, P56357, P56356, P56327, P32976, P56351, P56358, P56366, P56363, P56360, P56367, P56353, P56324, O20143, P56307, P56364, P56312, P56370, O20120, O20133, P56328, O20162, P56326, P56345, P56314, O20142, O20159, O20130, O20173, P56311, P56313, O20118, P56290, P56349, P56347, P56369, P32979, P56343 |
